# Supplementary material for: Pasireotide for acromegaly: long-term outcomes from an extension to the Phase III PAOLA study
Source: PubMed Central journal article supplement (PMC7222286; doi:10.1530/eje-19-0762), 2020-03-27

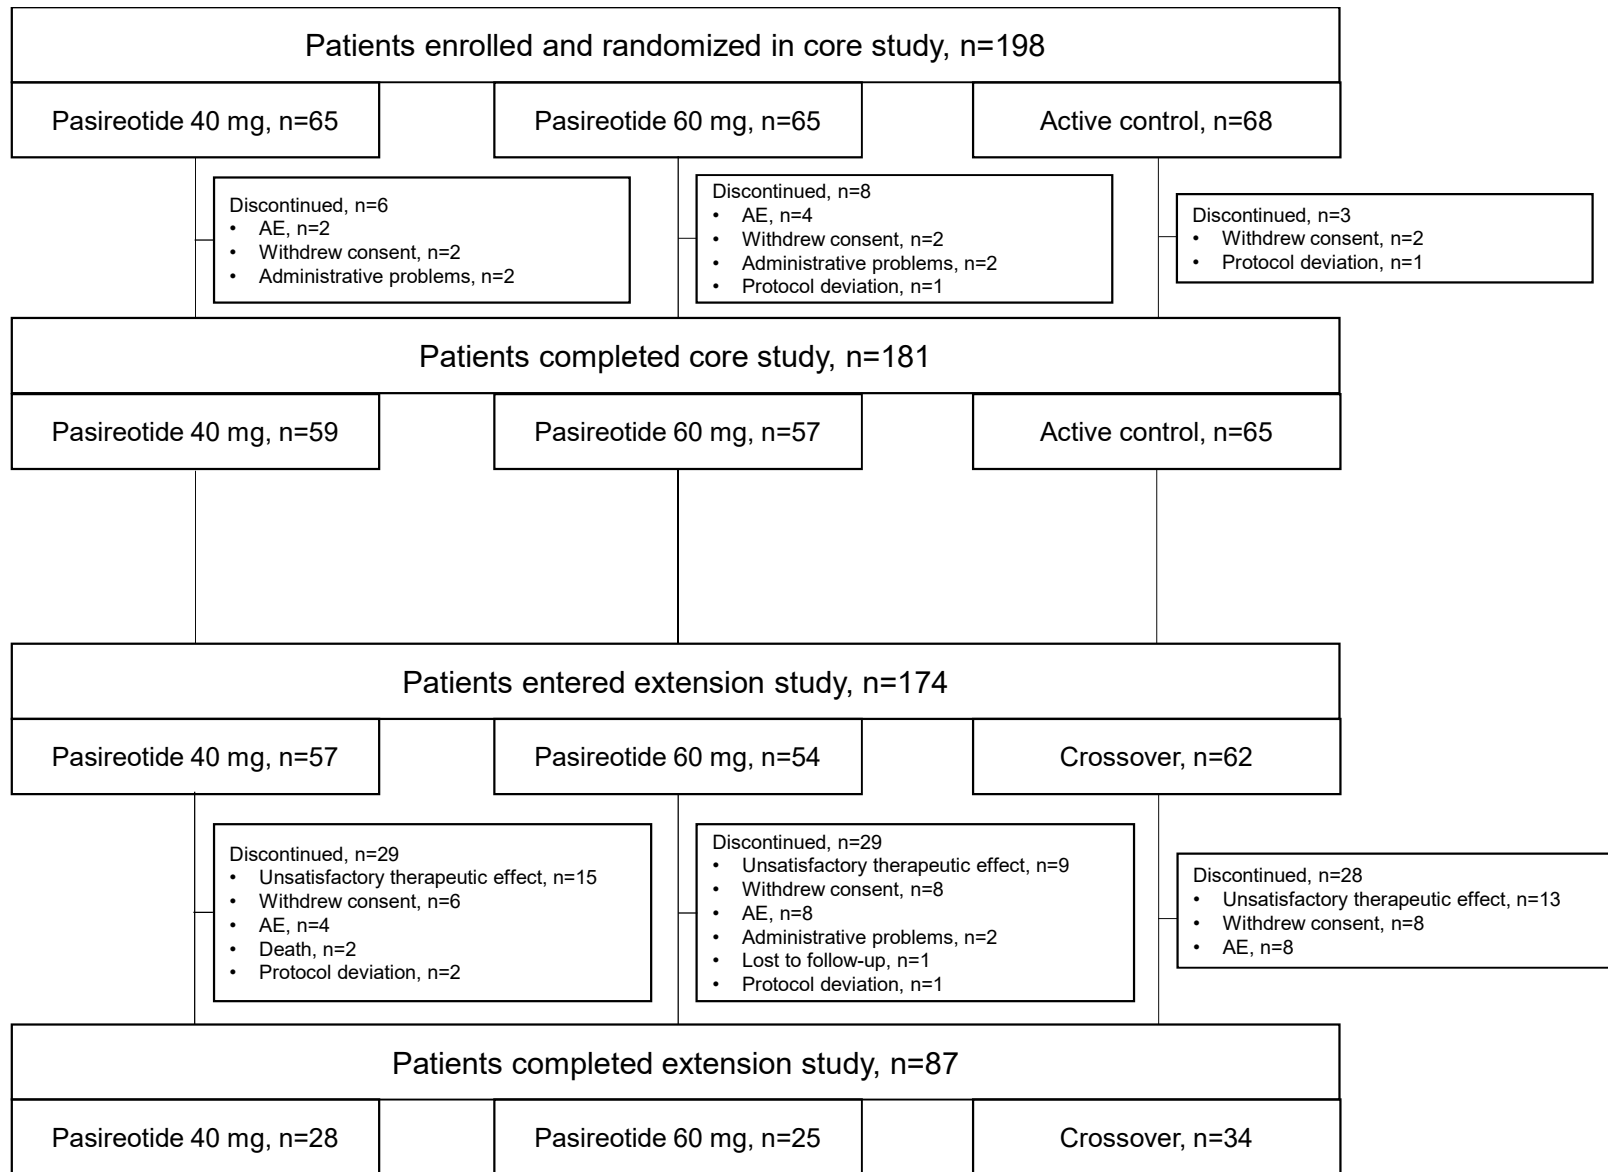

Supplement: supplementary_figure_1.pdf [file supplementary_figure_1.pdf]
